# Supplementary material for: Evaluation of antibody fragment properties for near-infrared fluorescence imaging of HER3-positive cancer xenografts
Source: PubMed Central journal article supplement — Theranostics. 2018 Sep 9;8(17):4856–69. doi: 10.7150/thno.24252 (PMC6160764; doi:10.7150/thno.24252), 2018-09-09
Supplement: thnov08p4856s1.pdf [file thnov08p4856s1.pdf]

## Supplementary Table-1

Protein sequence for anti-HER3 antibody fragments:

| Anti-HER3 fragment | Amino acid sequence                                                                                                                                                                                                                                                                                                                                                                                                                                                                                                                                                                                                                                                                                 |
|--------------------|-----------------------------------------------------------------------------------------------------------------------------------------------------------------------------------------------------------------------------------------------------------------------------------------------------------------------------------------------------------------------------------------------------------------------------------------------------------------------------------------------------------------------------------------------------------------------------------------------------------------------------------------------------------------------------------------------------|
| scFv               | SDIQMTQSPSSLSASVGDRVTITCRASQGISNYLAWYQQKPGKAPKLLIYAA<br>SSLQSGVPSRFSGSRSGTDFLTISLQPEDFATYYCQQYGWLPLTFGQGTKV<br>EIKGGGGSGGGGSGGGGSEISEVQLVESGGGLVQPGGSLRLSCAASGFTFSSY<br>GMHWVRQAPGKGLEWVAVISYDGSNKYYADSVKGRFTISRDN SKNTLYLQ<br>MNSLRAEDTAVYYCARTDPYSLGGYYFDYWGQGLTVTVSS                                                                                                                                                                                                                                                                                                                                                                                                                             |
| diabody            | SDIQMTQSPSSLSASVGDRVTITCRASQGISNYLAWYQQKPGKAPKLLIYAA<br>SSLQSGVPSRFSGSRSGTDFLTISLQPEDFATYYCQQYGWLPLTFGQGTKV<br>EIKGGGGSEISEVQLVESGGGLVQPGGSLRLSCAASGFTFSSYGMHWVRQAP<br>GKGLEWVAVISYDGSNKYYADSVKGRFTISRDN SKNTLYLQMNSLRAEDTA<br>VYYCARTDPYSLGGYYFDYWGQGLTVTVSS                                                                                                                                                                                                                                                                                                                                                                                                                                       |
| Fab                | <p><i>Light Chain:</i><br/>           SDIQMTQSPSSLSASVGDRVTITCRASQGISNYLAWYQQKPGKAPKLLIYAA<br/>           SSLQSGVPSRFSGSRSGTDFLTISLQPEDFATYYCQQYGWLPLTFGQGTKV<br/>           EIKRTVAAPSVFIFPPSDSQLKSGTASVVCLLNNFYPREAKVQWKVDNALQS<br/>           GNSQESVTEQDSKDYSLSTLTLSKADYEKHKVYACEVTHQGLSSPVTKS<br/>           FNRGECGGSDYKDDDDK</p> <p><i>Heavy Chain:</i><br/>           EISEVQLVESGGGLVQPGGSLRLSCAASGFTFSSYGMHWVRQAPGKGLEWV<br/>           AVISYDGSNKYYADSVKGRFTISRDN SKNTLYLQMNSLRAEDTAVYYCART<br/>           DPYSLGGYYFDYWGQGLTVTVSSASTKGPSVFPLAPSSKSTSGGTAALGCLV<br/>           KDYFPEPVTVSWNSGALTSGVHTFPAVLQSSGLYSLSSVTVPSSSLGTQTYI<br/>           CNVNHKPSNTKVDKKEPKSCDKTHTGGSHHHHHH</p> |

|                                   |                                                                                                                                                                                                                                                                                                                                                                                                                                                                                                                                                                                                                                                                                                                                                                                                                                              |
|-----------------------------------|----------------------------------------------------------------------------------------------------------------------------------------------------------------------------------------------------------------------------------------------------------------------------------------------------------------------------------------------------------------------------------------------------------------------------------------------------------------------------------------------------------------------------------------------------------------------------------------------------------------------------------------------------------------------------------------------------------------------------------------------------------------------------------------------------------------------------------------------|
| <p><b>scFv-C<sub>H3</sub></b></p> | <p>SDIQMTQSPSSLSASVGDRVTITCRASQGISNYLAWYQQKPGKAPKLLIYAA<br/> SSLQSGVPSRFSGSRSGTDFTLTISSLQPEDFATYYCQQYGWLPLTFGQGTKV<br/> EIKGGGGSGGGGSGGGGSEISEVQLVESGGGLVQPGGSLRLSCAASGFTFSSY<br/> GMHWVRQAPGKGLEWVAVISYDGSNKYYADSVKGRFTISRDN SKNTLYLQ<br/> MNSLRAEDTAVYYCARTDPYSLGGYYFDYWGQGLTVTVSSEPKSCDKTHTC<br/> PPCPGQPREPQVYTLPPSREEMTKNQVSLTCLVKGFYPSDIAVEWESNGQPEN<br/> NYKTTTPVLDS DGSFFLYSKLTVDKSRWQQGNVFSCSVMHEALHNHYT<br/> QKSLSLSPGK</p>                                                                                                                                                                                                                                                                                                                                                                                                        |
| <p><b>scFv-Fc</b></p>             | <p>SDIQMTQSPSSLSASVGDRVTITCRASQGISNYLAWYQQKPGKAPKLLIYAA<br/> SSLQSGVPSRFSGSRSGTDFTLTISSLQPEDFATYYCQQYGWLPLTFGQGTKV<br/> EIKGGGGSGGGGSGGGGSEISEVQLVESGGGLVQPGGSLRLSCAASGFTFSSY<br/> GMHWVRQAPGKGLEWVAVISYDGSNKYYADSVKGRFTISRDN SKNTLYLQ<br/> MNSLRAEDTAVYYCARTDPYSLGGYYFDYWGQGLTVTVSSEPKSCDKTHTC<br/> PPCPAPELLGGPSVFLFPPKPKDTLMISRTPEVTCVVVDVSHEDPEVKFNWYV<br/> DGVEVHNAKTKPREEQYNSTYRVVSVLTVLHQDWLNGKEYKCKVSNKALP<br/> APIEKTISKAKGQPREPQVYTLPPSREEMTKNQVSLTCLVKGFYPSDIAVEWE<br/> SNGQPENNYKTTTPVLDS DGSFFLYSKLTVDKSRWQQGNVFSCSVMHEALH<br/> NHYTQKSLSLSPGK</p>                                                                                                                                                                                                                                                                              |
| <p><b>IgG</b></p>                 | <p><i>Light Chain:</i><br/> SDIQMTQSPSSLSASVGDRVTITCRASQGISNYLAWYQQKPGKAPKLLIYAA<br/> SSLQSGVPSRFSGSRSGTDFTLTISSLQPEDFATYYCQQYGWLPLTFGQGTKV<br/> EIKRTVAAPS VFIFPPSDEQLKSGTASV VCLLN NFYPREAKVQWKVDNALQS<br/> GNSQESVTEQDSKDSTYLSSTLTLSKADYEKHKVYACEVTHQGLSSPVTKS<br/> FNRGEC</p> <p><i>Heavy Chain:</i><br/> EISEVQLVESGGGLVQPGGSLRLSCAASGFTFSSYGMHWVRQAPGKGLEWV<br/> AVISYDGSNKYYADSVKGRFTISRDN SKNTLYLQMNSLRAEDTAVYYCART<br/> DPYSLGGYYFDYWGQGLTVTVSSASTKGPSVFPLAPSSKSTSGGTAALGCLV<br/> KD YFPEPVTVSWNSGALTSGVHTFPAVLQSSGLYSLSSVVTVPSSSLGTQTYI<br/> CNVNHKPSNTKVDKKVEPKSCDKTHTCPPCPAPELLGGPSVFLFPPKPKDTL<br/> MISRTPEVTCVVVDVSHEDPEVKFNWYVDGVEVHNAKTKPREEQYNSTYRV<br/> VSVLTVLHQDWLNGKEYKCKVSNKALPAPIEKTISKAKGQPREPQVYTLPPSR<br/> EEMTKNQVSLTCLVKGFYPSDIAVEWESNGQPENNYKTTTPVLDS DGSFFLYS<br/> KLTVDKSRWQQGNVFSCSVMHEALHNHYTQKSLSLSPGK</p> |

## Supplementary Figure S1

**scFv**

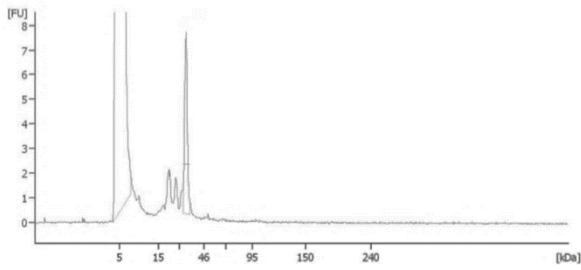

**Fab**

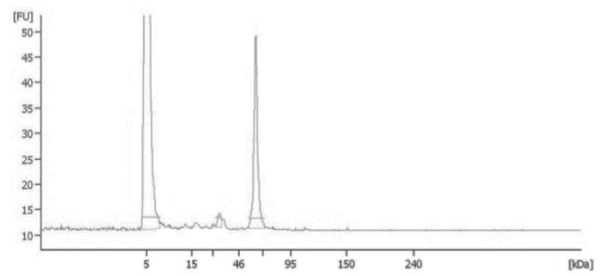

**Diabody**

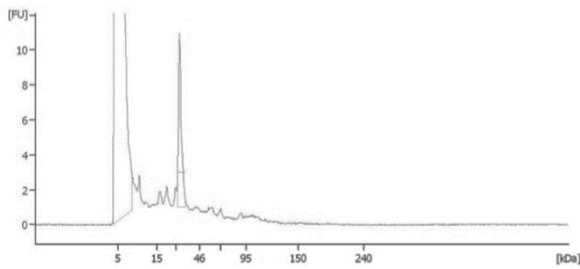

**scFv-C<sub>H</sub>3**

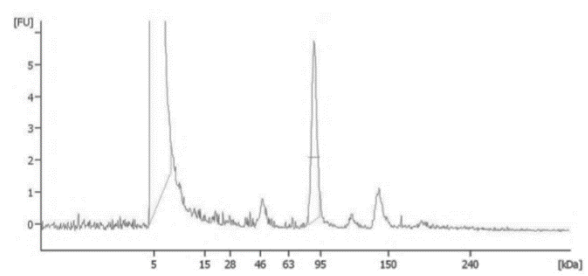

**scFv-Fc**

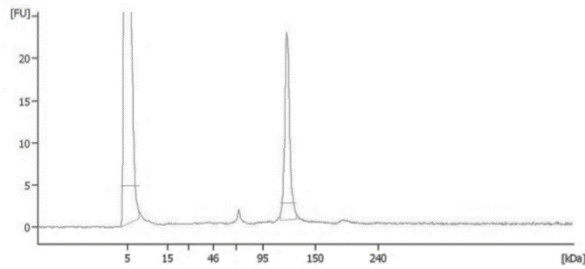

**IgG**

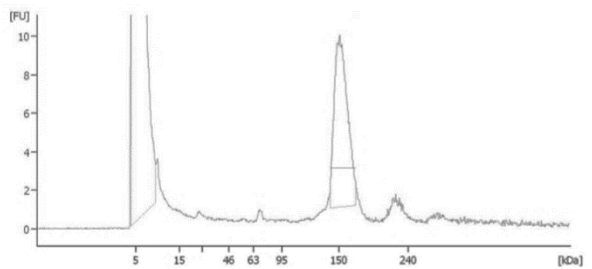

| Anti-HER3 Construct   | Observed size, kDa | Purity |
|-----------------------|--------------------|--------|
| scFv                  | 32.6               | 75%    |
| Fab                   | 58.0               | 93%    |
| Diabody               | 30.4 (60.8)*       | 87%    |
| scFv-C <sub>H</sub> 3 | 88.5               | 81%    |
| scFv-Fc               | 120.7              | 96%    |
| IgG                   | 150.7              | 94%    |

\*The size between brackets is the size of the dimer.

**Supplementary Figure S1:** Characterization of anti-HER3 antibody fragments using the Agilent Bioanalyzer 2100. Representative Bioanalyzer electropherograms of anti-HER3 scFv, diabody, Fab, scFv-C<sub>H</sub>3, scFv-Fc, and IgG under non-reducing conditions. Molecular weight and purity of the IgG and antibody fragments (%) were calculated based on protein standards from an Agilent High Sensitivity Protein 250 kit and are summarized in the table.

## Supplementary Figure S2

### A

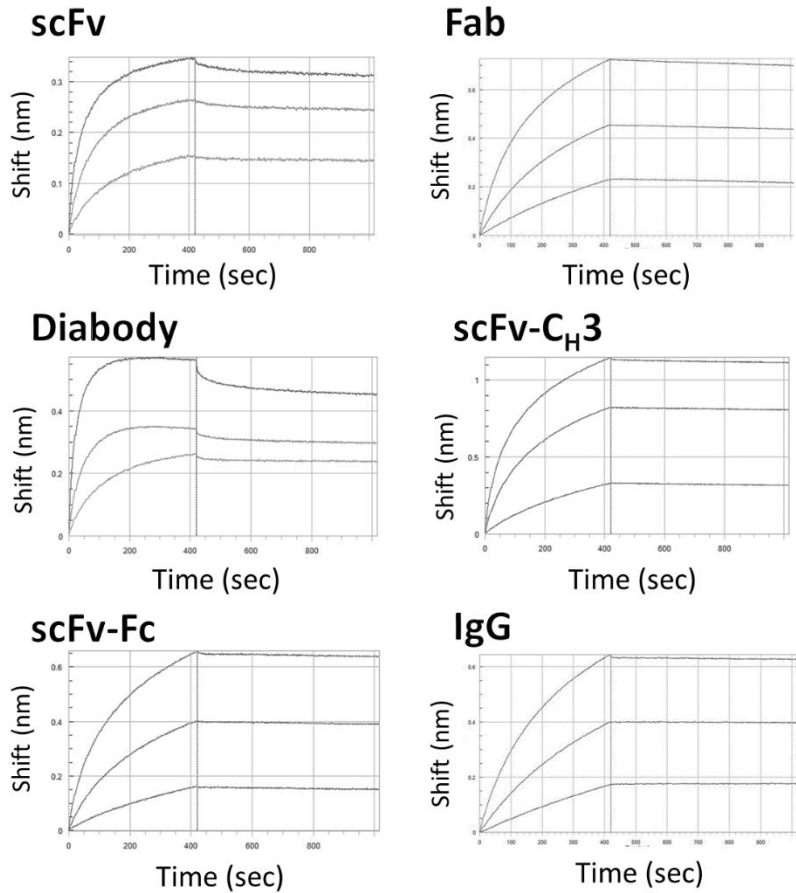

### B

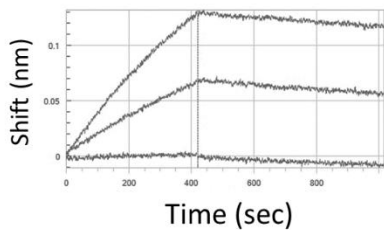

**Supplementary Figure S2:** Biolayer interferometry analysis of binding kinetics of anti-HER3 antibody fragments. **A)** Binding kinetics anti-HER3 scFv, diabody, Fab, scFv-CH<sub>3</sub>, scFv-Fc, and IgG against recombinant human HER3 extracellular domain. Lines represent the three concentrations of target tested; 52.6, 131.6, and 263.2 nM **B)** Binding kinetics anti-HER3 IgG against recombinant mouse HER3 extracellular domain. Lines represent the three concentrations of target tested; 10.5, 131.6, and 263.2 nM

### Supplementary Figure S3

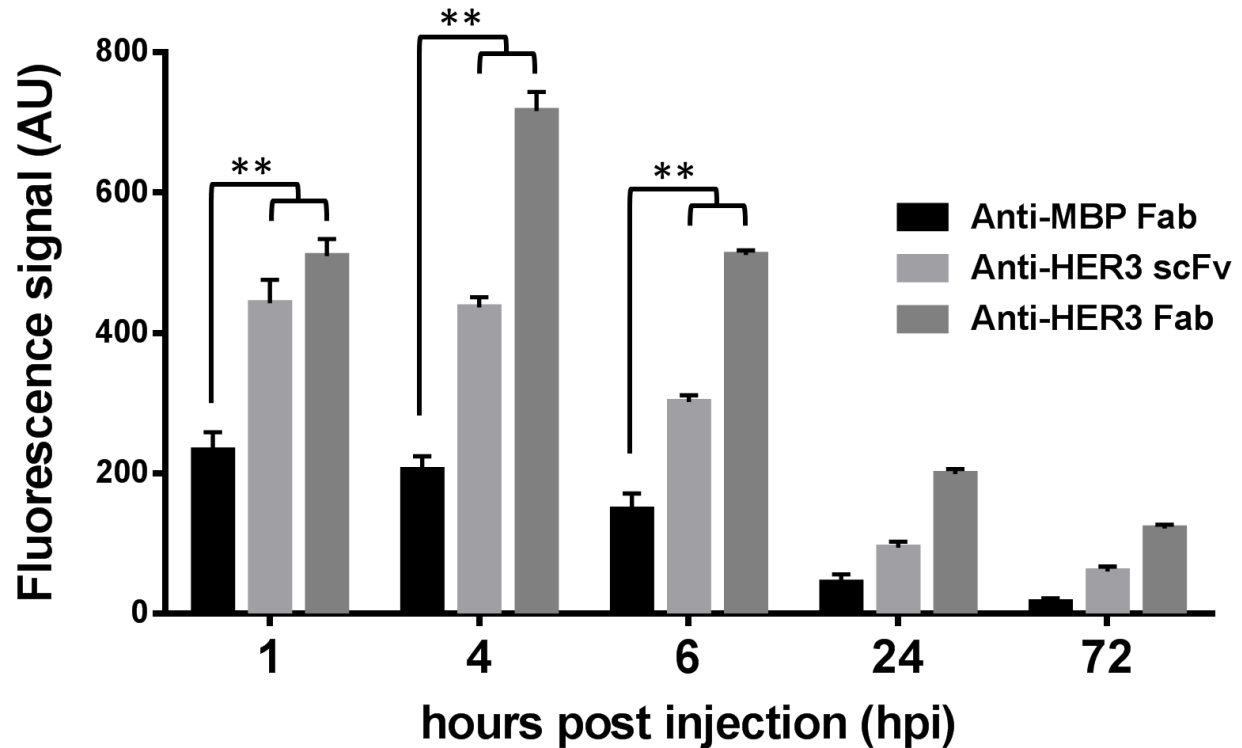

**Supplementary Figure S3:** Biodistribution analysis of IRDye800CW-labeled monovalent antibody fragments in mice bearing FaDu xenografts. Mean fluorescent signal (arbitrary units) for control anti-MBP Fab (black) anti-HER3 scFv (light gray), and Fab (dark gray) in FaDu xenografts at 1, 4, 6, 24 and 72 hours post injection (hpi). \*\* = p value < 0.01, AU represents arbitrary units. Error bars represent standard error of the mean.

## Supplementary Figure S4

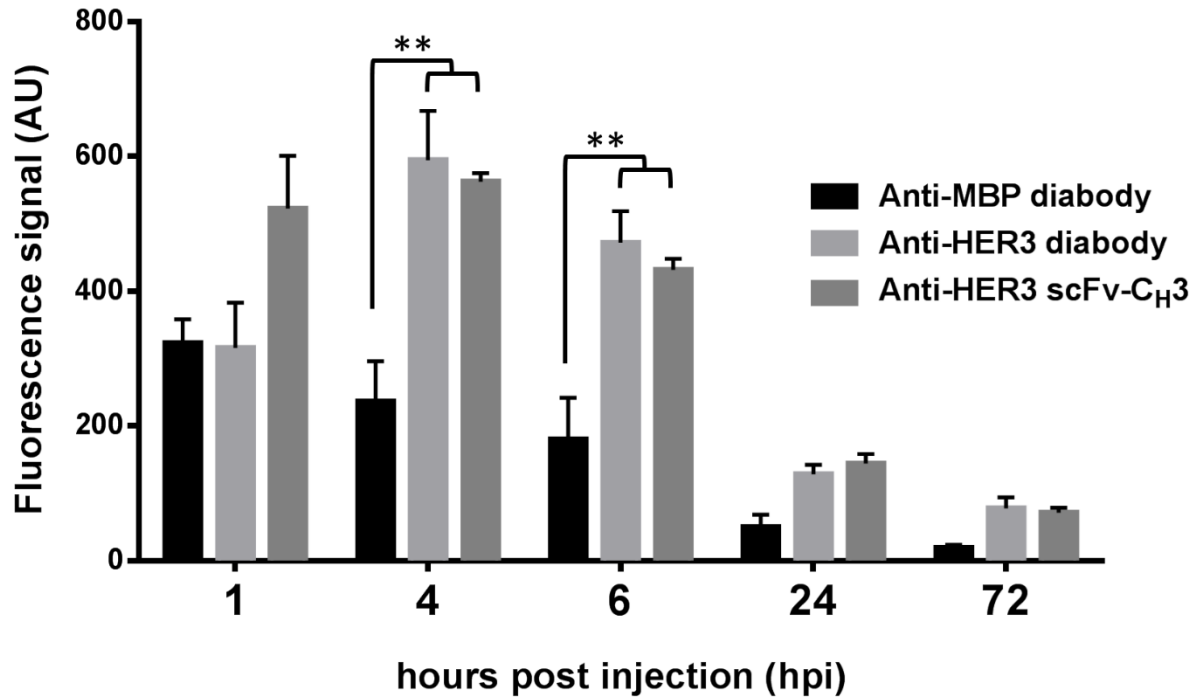

**Supplementary Figure S4:** Biodistribution analysis of IRDye800CW-labeled bivalent antibody fragments lacking Fc domain in mice bearing FaDu xenografts. Mean fluorescent signal (arbitrary units) for control anti-MBP diabody (black) anti-HER3 diabody (light gray), and scFv-CH<sub>3</sub> (dark gray) in FaDu xenografts at 1, 4, 6, 24 and 72 hours post injection (hpi). \*\* = p value < 0.01, AU represents arbitrary units. Error bars represent standard error of the mean.

## Supplementary Figure S5

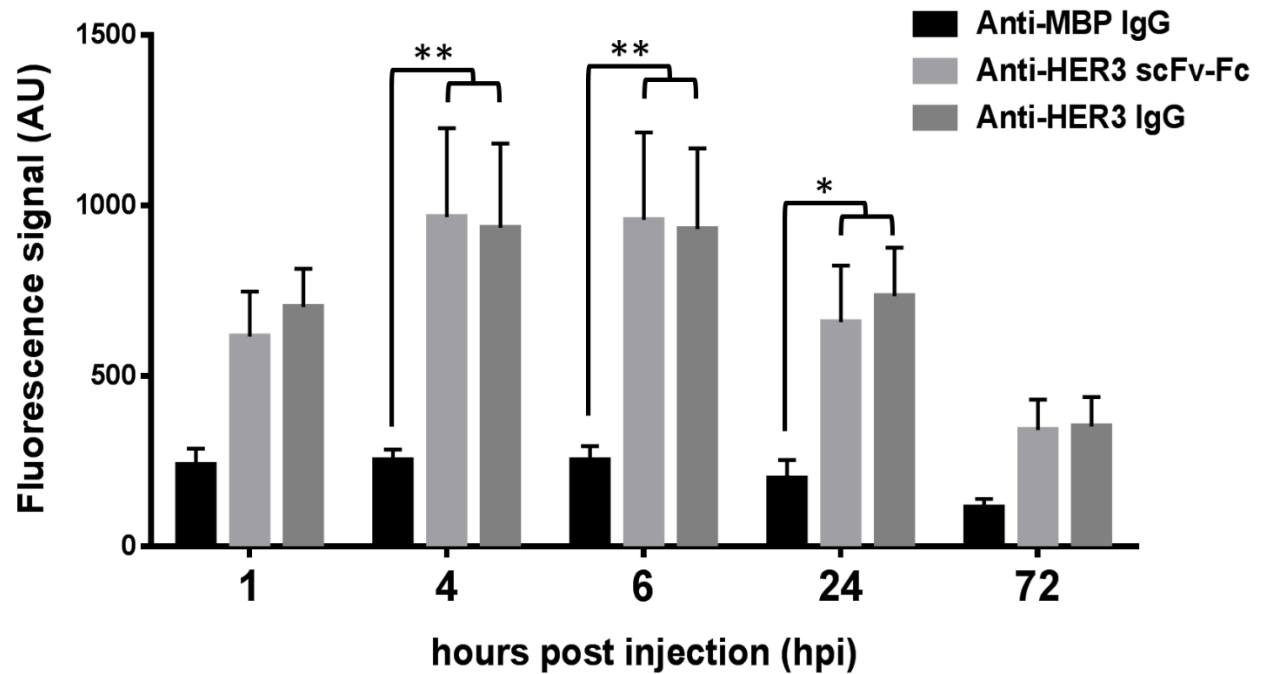

**Supplementary Figure S5:** Biodistribution analysis of IRDye800CW-labeled bivalent antibody and fragments containing Fc domain in mice bearing FaDu xenografts. Mean fluorescent signal (arbitrary units) for control anti-MBP IgG (black) anti-HER3 scFv-Fc (light gray), and IgG (dark gray) in FaDu xenografts at 1, 4, 6, 24 and 72 hours post injection (hpi). \* = p value < 0.05, \*\* = p value < 0.01, AU represents arbitrary units. Error bars represent standard error of the mean.



## Supplementary Figure S6

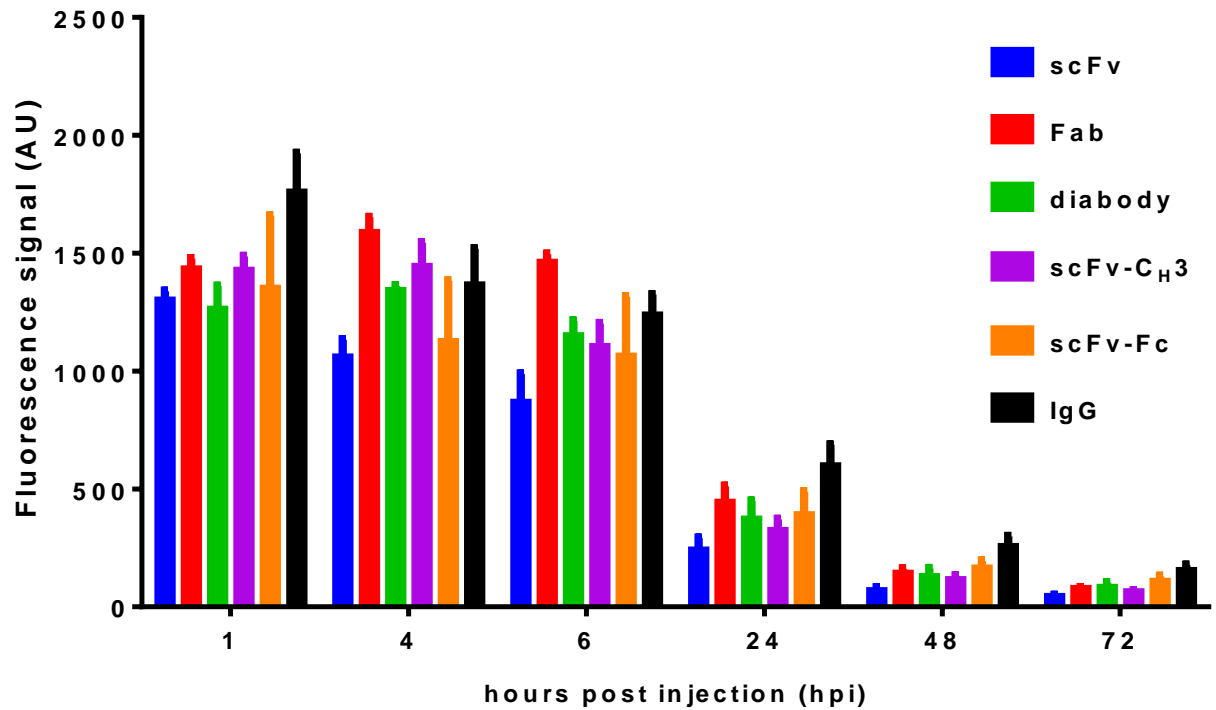

**Supplementary Figure S6:** Liver fluorescence of IRDye800CW-labeled anti-HER3 IgG and antibody fragments in mice bearing FaDu xenografts. Mean fluorescent signal (arbitrary units) for anti-HER3scFv (blue), Fab (red), diabody (green), scFv- $C_{H3}$  (purple), scFv-Fc (orange) and IgG (black) in liver at 1, 4, 6, 24, 48 and 72 hours post injection (hpi). AU represents arbitrary units. Error bars represent standard error of the mean.

## Supplementary Figure S7

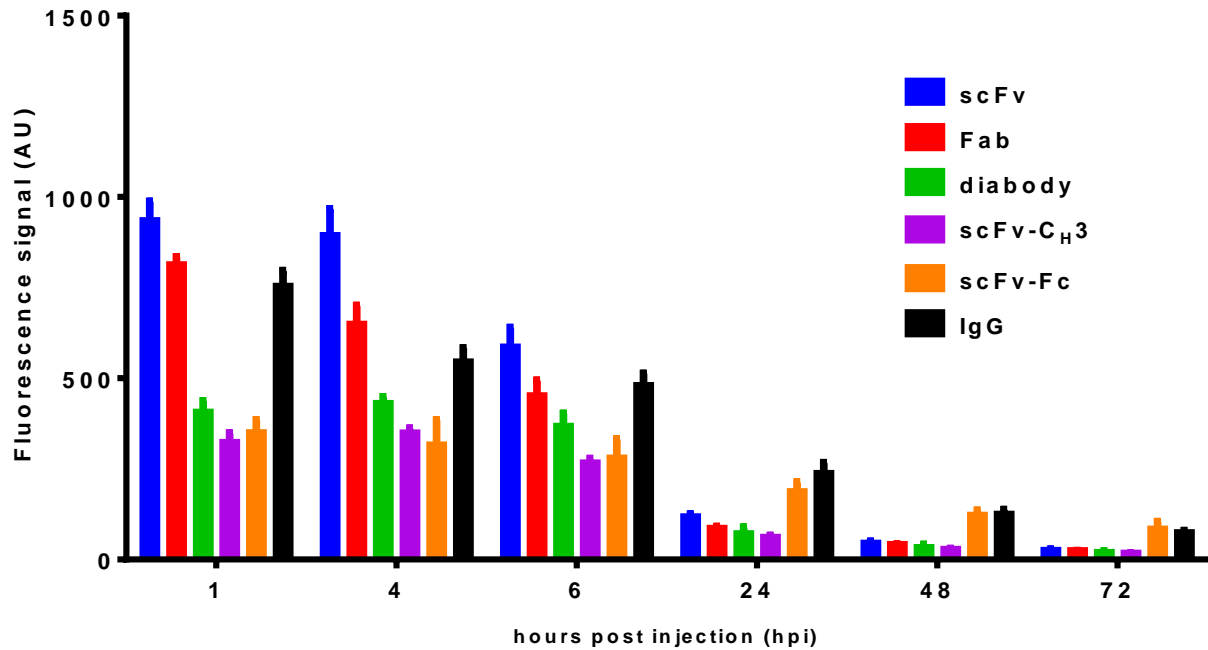

**Supplementary Figure S7:** Kidney fluorescence of IRDye800CW-labeled anti-HER3 IgG and antibody fragments in mice bearing FaDu xenografts. Mean fluorescent signal (arbitrary units) for anti-HER3scFv (blue), Fab (red), diabody (green), scFv-C<sub>H</sub>3 (purple), scFv-Fc (orange) and IgG (black) in kidney at 1, 4, 6, 24, 48 and 72 hours post injection (hpi). AU represents arbitrary units. Error bars represent standard error of the mean.

## Supplementary Figure S8

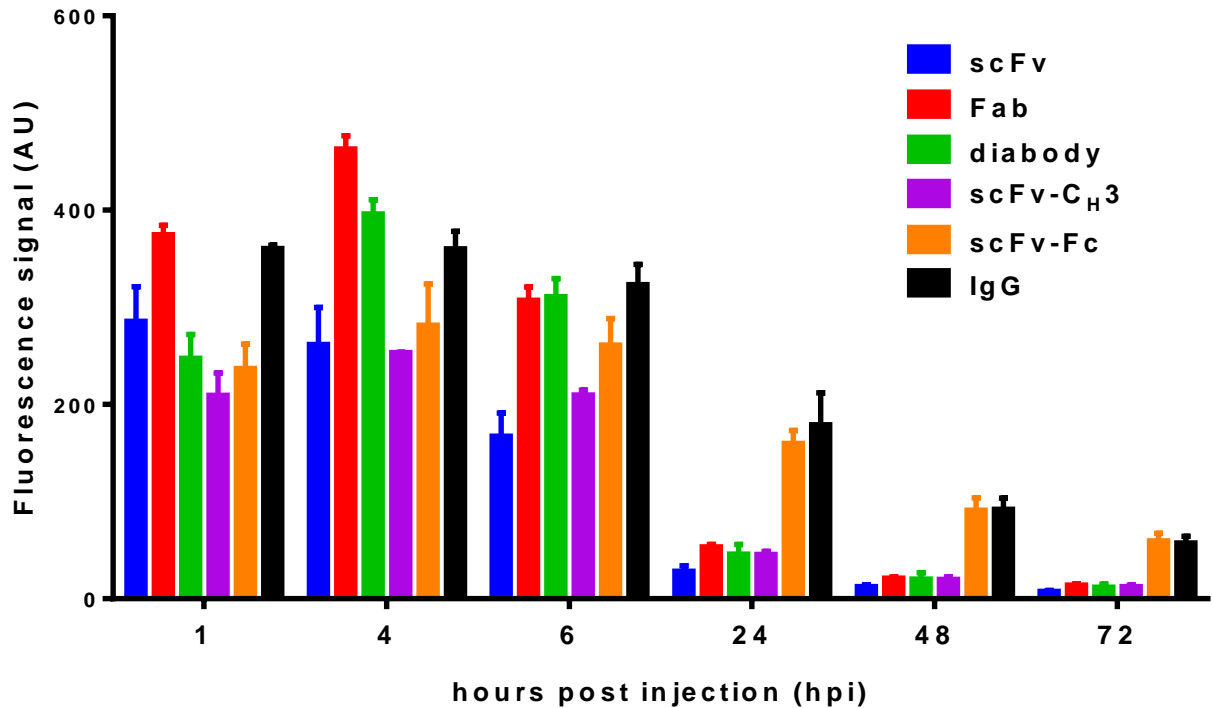

**Supplementary Figure S8:** Contralateral site fluorescence of IRDye800CW-labeled anti-HER3 IgG and antibody fragments in mice bearing FaDu xenografts. Mean fluorescent signal (arbitrary units) for anti-HER3scFv (blue), Fab (red), diabody (green), scFv-CH<sub>3</sub> (purple), scFv-Fc (orange) and IgG (black) in contralateral site at 1, 4, 6, 24, 48 and 72 hours post injection (hpi). \*\* = p value < 0.01, ns = p value > 0.05, AU represents arbitrary units. Error bars represent standard error of the mean.
